# Supplementary material for: Comparative Study of PVDF Sheets and Their Sensitivity to Mechanical Vibrations: The Role of Dimensions, Molecular Weight, Stretching and Poling
Source: MDPI journal article supplement (doi:10.3390/nano11071637), 2021-06-22
Supplement: s1 [file s1]

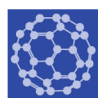

# Comparative Study of PVDF Sheets and Their Sensitivity to Mechanical Vibrations: The Role of Dimensions, Molecular Weight, Stretching and Poling

Miroslav Mrlík <sup>1,\*</sup>, Josef Osíčka <sup>1</sup>, Martin Cvek <sup>1</sup>, Markéta Ilčíková <sup>1,2,3,\*</sup>, Peter Srnec <sup>1</sup>, Danila Gorgol <sup>1</sup>, Pavel Tofel <sup>4,5</sup>

<sup>1</sup> Centre of Polymer Systems, Tomas Bata University in Zlín, Třída T. Bati 5678, 760 01 Zlín, Czech Republic; osicka@utb.cz (J.O.); cvek@utb.cz (M.C.); srnec@utb.cz (P.S.); gorgol@utb.cz (D.G.)

<sup>2</sup> Polymer Institute, Slovak Academy of Sciences, Dubravská cesta 9, 845 45, Bratislava 45, Slovakia

<sup>3</sup> Department of Physics and Materials Engineering, Faculty of Technology, Tomas Bata University in Zlín, Vavrečkova 275, 760 01 Zlín, Czech Republic

<sup>4</sup> Brno University of Technology, Department of Physics, Faculty of Electrical Engineering and Communication, Technická 10, 616 00, Brno, Czech Republic; tofel@feec.vutbr.cz

<sup>5</sup> CEITEC BUT – Brno University of Technology, Purkynova 656/123, 612 00 Brno, Czech Republic

\* Correspondence: mrlík@utb.cz (M.M.); ilcikova@utb.cz (M.I.)

**Table S1.** Sumarized values of piezoelectric charge coefficient  $d_{33}$  for 0% at various applied voltages.

| Sample code         | Applied voltage (kV mm <sup>-1</sup> ) |     |     |     |     |     |
|---------------------|----------------------------------------|-----|-----|-----|-----|-----|
|                     | 0                                      | 0.5 | 1   | 3   | 5   | 7   |
| PVDF 180 kDa 0.5 mm | N/A                                    | N/A | N/A | 0.1 | 0.2 | 0.4 |
| PVDF 180 kDa 0.8 mm | N/A                                    | N/A | N/A | N/A | N/A | N/A |
| PVDF 180 kDa 1.0 mm | N/A                                    | N/A | N/A | N/A | N/A | N/A |
| PVDF 275 kDa 0.5 mm | N/A                                    | N/A | 0.1 | 0.2 | 0.4 | 0.4 |
| PVDF 275 kDa 0.8 mm | N/A                                    | N/A | N/A | N/A | N/A | N/A |
| PVDF 275 kDa 1.0 mm | N/A                                    | N/A | N/A | N/A | N/A | N/A |
| PVDF 534 kDa 0.5 mm | N/A                                    | N/A | N/A | 0.1 | 0.1 | 0.3 |
| PVDF 534 kDa 0.8 mm | N/A                                    | N/A | N/A | N/A | N/A | N/A |
| PVDF 534 kDa 1.0 mm | N/A                                    | N/A | N/A | N/A | N/A | N/A |

\*N/A denotes the piezoelectric charge coefficient  $d_{33}$  values under the detection limit.

**Table S2.** Sumarized values of piezoelectric charge coefficient,  $d_{33}$  for 0 kV mm<sup>-1</sup> at various applied deformations.

| Sample code         | Applied strain (%) |     |     |     |     |     |
|---------------------|--------------------|-----|-----|-----|-----|-----|
|                     | 0                  | 50  | 100 | 200 | 300 | 500 |
| PVDF 180 kDa 0.5 mm | N/A                | N/A | N/A | N/A | 0.1 | 0.1 |
| PVDF 180 kDa 0.8 mm | N/A                | N/A | N/A | N/A | N/A | N/A |
| PVDF 180 kDa 1.0 mm | N/A                | N/A | N/A | N/A | N/A | N/A |
| PVDF 275 kDa 0.5 mm | N/A                | N/A | N/A | N/A | 0.1 | 0.3 |
| PVDF 275 kDa 0.8 mm | N/A                | N/A | N/A | N/A | N/A | N/A |
| PVDF 275 kDa 1.0 mm | N/A                | N/A | N/A | N/A | N/A | N/A |
| PVDF 534 kDa 0.5 mm | N/A                | N/A | N/A | N/A | 0.1 | 0.2 |
| PVDF 534 kDa 0.8 mm | N/A                | N/A | N/A | N/A | N/A | N/A |
| PVDF 534 kDa 1.0 mm | N/A                | N/A | N/A | N/A | N/A | N/A |

\*N/A denotes the piezoelectric charge coefficient  $d_{33}$  values under the detection limit.
